# Supplementary material for: EFEKTIFITAS KLINIK PENGGUNAANTRIAMCINOLONE ACETONIDE SEMPROT HIDUNGPADA PENDERITA RINITIS ALERGI PERENIALTHE EFFICACY OF TRIAMONOLONE ACETONIDE NASAL SPRAY INPATIENTS WITH PERENNIAL ALERGIC RIBNITIS
Source: Hindawi journal article supplement (doi:10.1155/2013/263952), 2003-01-01
Supplement: f1 [file 263952.f1.pdf]

Table-1S: This table presents SVM based prediction results for different physiochemical properties, which show difference between IL4-positive and IL4-negative peptides, at various positions on amino acid sequence.

| Input         | Method         | Residue position       | Param             | Thres | Sen   | Spec  | Acc   | MCC  | ROC  |
|---------------|----------------|------------------------|-------------------|-------|-------|-------|-------|------|------|
| <b>C-ter</b>  | Charge         | 3,4,5,6,9,10,12,15     | g:0.01 c:15 j:1   | 0.2   | 55.7  | 55.85 | 55.77 | 0.12 | 0.57 |
|               | Hydrophobicity | 1,2,3,5,11,12,13,14,15 | g:0.01 c:6 j:1    | 0.2   | 57.78 | 50.18 | 54.17 | 0.08 | 0.54 |
|               | pI             | 3,4,5,6,9,10,12,14     | g:0.01 c:1 j:1    | 0.1   | 56.18 | 53.72 | 55.01 | 0.1  | 0.54 |
|               | Steric effect  | 5,6,8,9,11,12,13       | g:0.0005 c:15 j:1 | 0.9   | 58.75 | 51.24 | 55.18 | 0.1  | 0.55 |
|               | Hybrid         |                        | g:0.005 c:5 j:2   | 0.7   | 58.27 | 52.3  | 55.43 | 0.11 | 0.57 |
| <b>N-ter</b>  | Charge         | 5,6,7,8,9,10,15        | g:0.5 c:1 j:1     | 0     | 60.83 | 57.8  | 59.39 | 0.19 | 0.6  |
|               | Hydrophilicity | 1,2,3,5,12             | g:0.1 c:7 j:1     | -0.2  | 63.72 | 55.5  | 59.81 | 0.19 | 0.6  |
|               | Hydropathy     | 1,2,3,5,6              | g:0.01 c:4 j:1    | 0.2   | 58.75 | 53.55 | 56.28 | 0.12 | 0.58 |
|               | Amphipathy     | 1,2,3,5,6,12           | g:0.01 c:7 j:1    | 0.1   | 54.57 | 62.77 | 58.47 | 0.17 | 0.6  |
|               | pI             | 3,4,5,6,9,10,12,14     | g:0.005 c:1 j:1   | -0.1  | 58.75 | 57.27 | 58.05 | 0.16 | 0.59 |
| <b>Hybrid</b> | Hybrid         |                        | g:0.01 c:1 j:1    | 0.1   | 60.67 | 58.69 | 59.73 | 0.19 | 0.63 |
|               | Hybrid C'+N'   |                        | g:0.01 c:1 j:1    | 0.1   | 62.44 | 56.38 | 59.56 | 0.19 | 0.63 |

Table 2S: Performances of various amino acid sequence based features with Support Vector Machine classifier on processed data (8-22 residue length) by incorporating length feature with other features. The best kernel optimized for all the results is rbf-kernel.

| Method                         | Param           | Thres | Sen   | Spec  | Acc   | MCC  | ROC  |
|--------------------------------|-----------------|-------|-------|-------|-------|------|------|
| <b>AA Composition + Length</b> | g:0.005 c:1 j:1 | 0.2   | 65.15 | 65.9  | 65.49 | 0.31 | 0.7  |
| <b>DP Composition +Length</b>  | g:0.001 c:1 j:2 | 0.5   | 68.47 | 62.26 | 65.67 | 0.31 | 0.7  |
| <b>AAP + Length</b>            | g:0.1 c:1 j:1   | 0.2   | 71.57 | 64.02 | 68.10 | 0.36 | 0.72 |
| <b>MERCI_AAC + Length</b>      | g:0.005 c:1 j:1 | 0.2   | 73.45 | 71.29 | 72.48 | 0.45 | 0.82 |
| <b>MERCI_DPC + Length</b>      | g:0.005 c:1 j:1 | 0.2   | 69.03 | 78.57 | 73.33 | 0.47 | 0.84 |
| <b>MERCI_AAP + Length</b>      | g:0.05 c:1 j:1  | 0.2   | 78.32 | 71.56 | 75.27 | 0.5  | 0.84 |

Table 3S: The performance of various features with SVM light on 5 folds cross validation

| Method            | Param            | Pos* | Neg* | Thrs | Sen   | Spec  | Acc   | MCC  | ROC  |
|-------------------|------------------|------|------|------|-------|-------|-------|------|------|
| Binary -9aa Cter  | g:0.05 c:7 j:4   | 893  | 738  | 0.2  | 51.4  | 60.84 | 55.67 | 0.12 | 0.58 |
| Binary -10aa Cter | g:0.05 c:15 j:5  | 871  | 727  | 0.1  | 57.29 | 54.06 | 55.82 | 0.11 | 0.57 |
| Binary -11aa Cter | g:0.1 c:3 j:4    | 833  | 668  | 0.1  | 58.58 | 51.2  | 55.3  | 0.1  | 0.56 |
| Binary -12aa Cter | g:0.1 c:9 j:2    | 811  | 656  | 0.1  | 59.43 | 54.57 | 57.26 | 0.14 | 0.57 |
| Binary -13aa Cter | g:0.1 c:1 j:4    | 704  | 632  | 0.3  | 53.41 | 55.22 | 54.27 | 0.09 | 0.56 |
| Binary -14aa Cter | g:0.1 c:1 j:2    | 666  | 610  | 0.2  | 60.96 | 51.97 | 56.66 | 0.13 | 0.59 |
| Binary -15aa Cter | g:0.01 c:17 j:2  | 623  | 564  | 0.3  | 60.03 | 51.6  | 56.02 | 0.12 | 0.56 |
| AAC -9aa Cter     | g:0.001 c:6 j:3  | 893  | 738  | 0.2  | 62.37 | 53.93 | 58.55 | 0.16 | 0.6  |
| AAC -10aa Cter    | g:0.0005 c:2 j:1 | 871  | 727  | 0.3  | 63.15 | 56.12 | 59.95 | 0.19 | 0.62 |
| AAC -11aa Cter    | g:0.001 c:1 j:1  | 833  | 668  | 0.3  | 65.91 | 58.38 | 62.56 | 0.24 | 0.66 |
| AAC -12aa Cter    | g:0.005 c:1 j:1  | 811  | 656  | 0.2  | 61.53 | 65.24 | 63.19 | 0.27 | 0.67 |
| AAC -13aa Cter    | g:0.001 c:4 j:1  | 704  | 632  | 0.2  | 63.35 | 62.5  | 62.95 | 0.26 | 0.66 |
| AAC -14aa Cter    | g:0.0005 c:4 j:1 | 666  | 610  | 0.2  | 63.51 | 58.85 | 61.29 | 0.22 | 0.65 |
| AAC -15aa Cter    | g:0.001 c:6 j:1  | 623  | 564  | 0.1  | 65.81 | 61.52 | 63.77 | 0.27 | 0.68 |
| DPC -9aa Cter     | g:0.001 c:2 j:1  | 893  | 738  | 0.1  | 62.71 | 61.11 | 61.99 | 0.24 | 0.67 |
| DPC -10aa Cter    | g:0.001 c:2 j:2  | 871  | 727  | 0.1  | 64.64 | 58.05 | 61.64 | 0.23 | 0.66 |
| DPC -11aa Cter    | g:0.001 c:6 j:1  | 833  | 668  | 0.1  | 63.51 | 58.38 | 61.23 | 0.22 | 0.67 |
| DPC -12aa Cter    | g:0.005 c:15 j:1 | 811  | 656  | 0.1  | 66.34 | 61.74 | 64.28 | 0.28 | 0.69 |
| DPC -13aa Cter    | g:0.001 c:5 j:1  | 704  | 632  | 0    | 68.89 | 59.18 | 64.3  | 0.28 | 0.69 |
| DPC -14aa Cter    | g:0.001 c:1 j:1  | 666  | 610  | 0.1  | 66.82 | 56.89 | 62.07 | 0.24 | 0.66 |
| DPC -15aa Cter    | g:0.001 c:4 j:3  | 623  | 564  | 0.1  | 64.04 | 63.83 | 63.94 | 0.28 | 0.68 |
| Binary -9aa Nter  | g:0.05 c:7 j:1   | 893  | 738  | 0.1  | 57.45 | 53.93 | 55.86 | 0.11 | 0.58 |
| Binary -10aa Nter | g:0.1 c:2 j:3    | 871  | 727  | 0.1  | 61.19 | 51.44 | 56.76 | 0.13 | 0.6  |
| Binary -11aa Nter | g:0.01 c:8 j:1   | 833  | 668  | 0.2  | 59.18 | 54.19 | 56.96 | 0.13 | 0.58 |
| Binary -12aa Nter | g:0.01 c:10 j:1  | 811  | 656  | 0.2  | 58.2  | 59.91 | 58.96 | 0.18 | 0.59 |
| Binary -13aa Nter | g:0.1 c:1 j:1    | 704  | 632  | 0.1  | 56.96 | 58.86 | 57.86 | 0.16 | 0.62 |
| Binary -14aa Nter | g:0.1 c:1 j:1    | 666  | 610  | 0.1  | 55.56 | 62.13 | 58.7  | 0.18 | 0.61 |
| Binary -15aa Nter | g:0.005 c:2 j:1  | 623  | 564  | 0.2  | 59.71 | 54.43 | 57.2  | 0.14 | 0.6  |
| AAC -9aa Nter     | g:0.005 c:8 j:3  | 893  | 738  | 0.1  | 62.37 | 64.63 | 63.4  | 0.27 | 0.68 |
| AAC -10aa Nter    | g:0.001 c:2 j:1  | 871  | 727  | 0.2  | 65.33 | 57.63 | 61.83 | 0.23 | 0.65 |
| AAC -11aa Nter    | g:0.005 c:1 j:2  | 833  | 668  | 0.2  | 65.19 | 67.66 | 66.29 | 0.33 | 0.71 |
| AAC -12aa Nter    | g:0.005 c:1 j:2  | 811  | 656  | 0.2  | 65.1  | 67.23 | 66.05 | 0.32 | 0.72 |
| AAC -13aa Nter    | g:0.01 c:1 j:2   | 704  | 632  | 0.1  | 64.77 | 67.25 | 65.94 | 0.32 | 0.71 |
| AAC -14aa Nter    | g:0.005 c:2 j:1  | 666  | 610  | 0    | 69.97 | 60.82 | 65.6  | 0.31 | 0.71 |
| AAC -15aa Nter    | g:0.001 c:20 j:2 | 623  | 564  | 0.1  | 69.34 | 63.83 | 66.72 | 0.33 | 0.7  |
| DPC -9aa Nter     | g:0.001 c:6 j:5  | 893  | 738  | 0.1  | 65.06 | 60.98 | 63.21 | 0.26 | 0.68 |
| DPC -10aa Nter    | g:0.001 c:2 j:1  | 871  | 727  | 0.1  | 63.61 | 63.82 | 63.7  | 0.27 | 0.69 |
| DPC -11aa Nter    | g:0.001 c:1 j:1  | 833  | 668  | 0.2  | 67.95 | 60.03 | 64.42 | 0.28 | 0.69 |
| DPC -12aa Nter    | g:0.005 c:15 j:2 | 811  | 656  | 0.1  | 71.15 | 61.28 | 66.73 | 0.33 | 0.73 |

|               |                 |     |     |     |       |       |       |      |      |
|---------------|-----------------|-----|-----|-----|-------|-------|-------|------|------|
| DPC-13aa Nter | g:0.001 c:2 j:2 | 704 | 632 | 0.2 | 62.64 | 67.88 | 65.12 | 0.3  | 0.71 |
| DPC-14aa Nter | g:0.001 c:9 j:1 | 666 | 610 | 0.1 | 61.26 | 69.02 | 64.97 | 0.3  | 0.7  |
| DPC-15aa Nter | g:0.001 c:6 j:1 | 623 | 564 | 0   | 68.38 | 59.93 | 64.36 | 0.28 | 0.69 |

\* Variation in the number of positive and negative dataset on window length is because we have considered only those epitopes that have length above or equal to that particular window length.

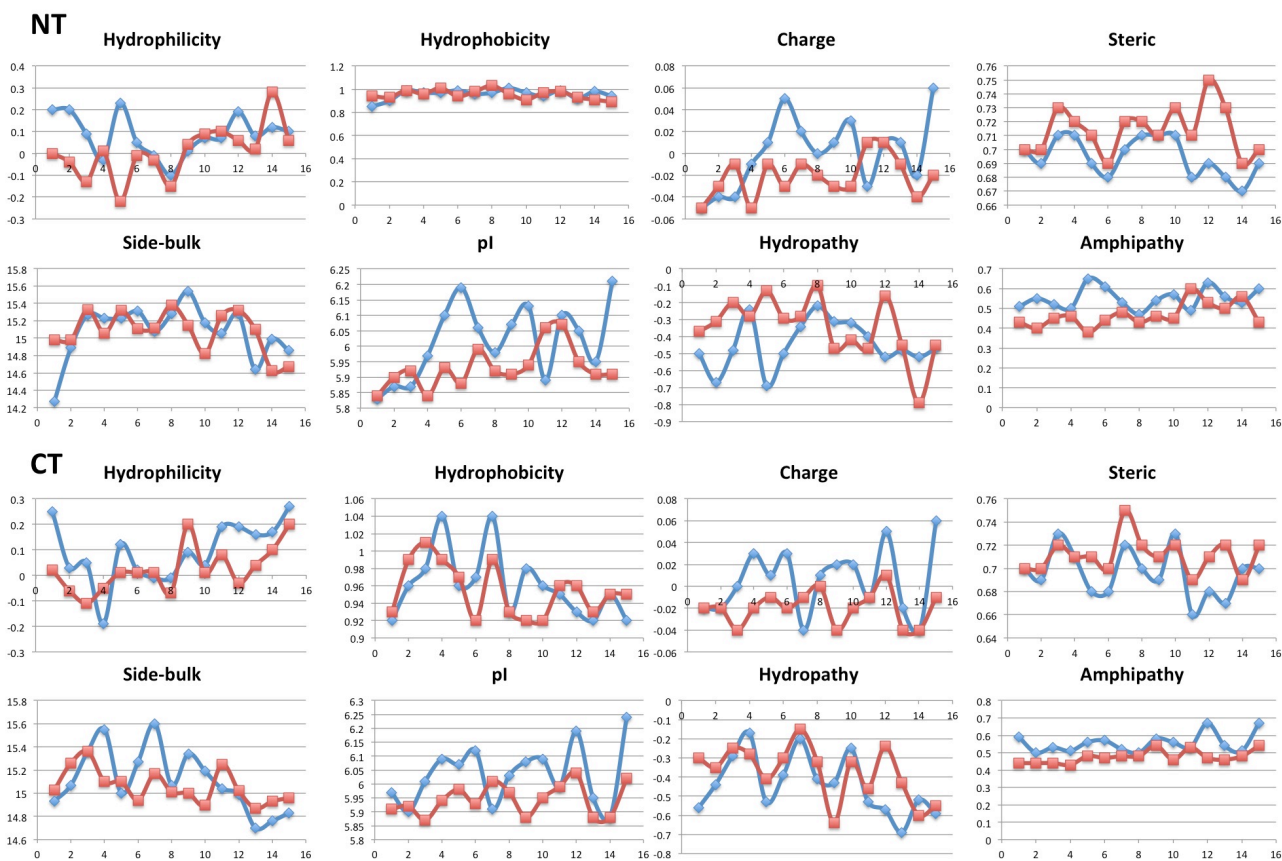

Figure-1S: showing position specific distribution of different physiochemical properties at C-terminal and N-terminal. NT and CT denotes for N-terminal and C-terminal respectively. Blue color line represent IL4+ and red color line denotes IL4- data.

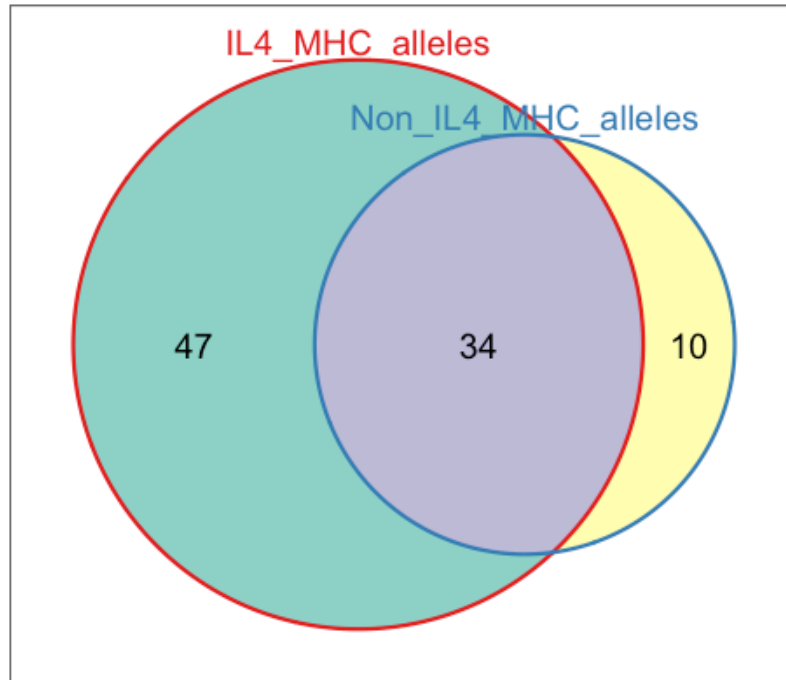

Figure-2S: The Venn Diagram to represent the distribution of MHC alleles among IL4 assays.

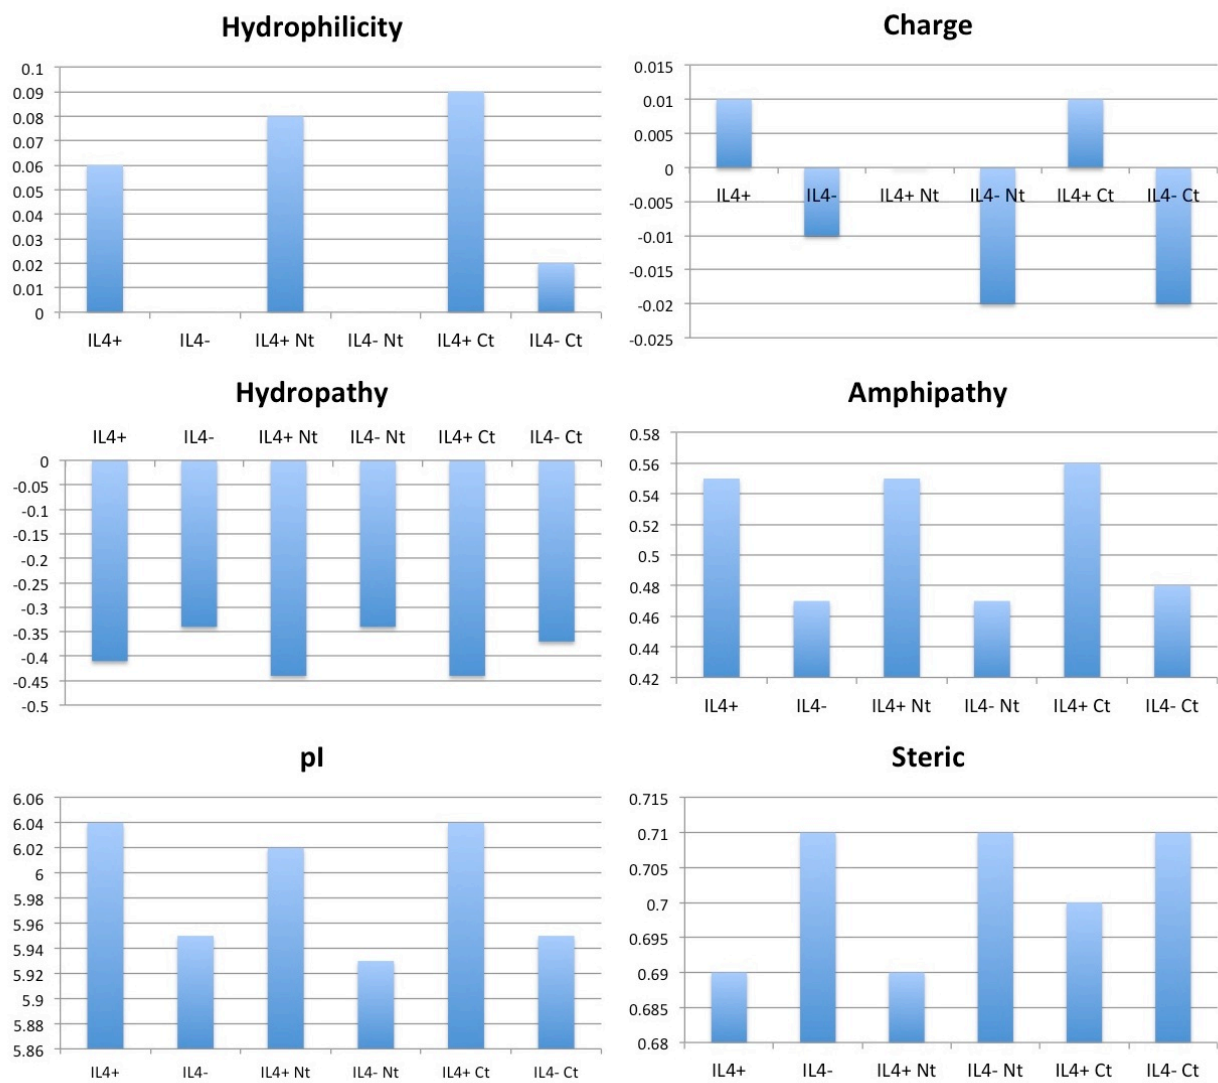

Figure-3S: showing preference of different physiochemical properties between IL4-positive and IL4-negative peptides. Here IL4+, IL4-, Nt and Ct denotes for IL4-positive, IL4-negative, N-terminal and C-terminal respectively.

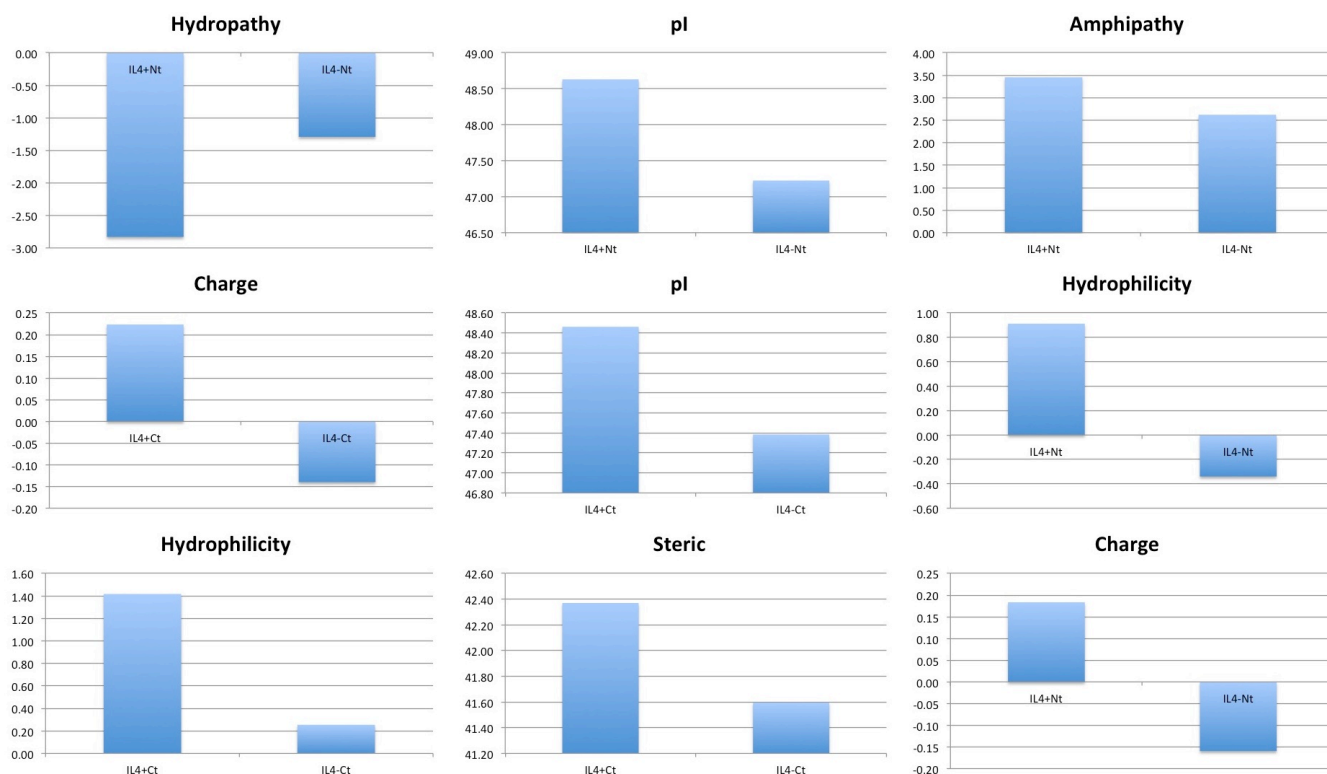

Figure-4S: showing preference of different physiochemical properties between IL4-positive and IL4-negative peptides. Here Y-axis shows cumulative sum of that property for selected residues (dominating in IL4-positive) from figure 1S. Here IL4+, IL4-, Nt and Ct denotes for IL4-positive, IL4-negative, N-terminal and C-terminal respectively.
